# Supplementary material for: Macrofaunal community inside and outside of the Darwin Mounds Special Area of Conservation, NE Atlantic
Source: Copernicus journal article supplement (doi:10.5194/bg-10-3705-2013), 2013-06-05
Supplement: Supplementary file 1 [file bg-10-3705-2013-supplement.pdf]

Supplement

List of abundances (per m<sup>2</sup>) of all the identified and putative species from each sampling station inside (107, 108 and 112) and outwith (113, 114 and 115) the SAC (ind. – indeterminate).

| Phylum       | Class / sub-class      | Order/Family     | gen/species                    | Sampling stations |     |     |     |     |     |
|--------------|------------------------|------------------|--------------------------------|-------------------|-----|-----|-----|-----|-----|
|              |                        |                  |                                | 107               | 108 | 112 | 113 | 114 | 115 |
| Annelida     | Polychaeta             | Ampharetidae     | <i>Sabellides</i> sp_1         | 0                 | 0   | 32  | 0   | 16  | 16  |
|              |                        |                  | <i>Melinna</i> sp_1            | 0                 | 32  | 0   | 0   | 0   | 16  |
|              |                        |                  | <i>Melythasides</i> sp_1       | 36                | 16  | 0   | 0   | 0   | 0   |
|              |                        |                  | <i>Samythella</i> sp_1         | 0                 | 16  | 0   | 0   | 0   | 0   |
|              |                        |                  | <i>Sosane</i> sp_1             | 0                 | 16  | 0   | 0   | 0   | 0   |
|              |                        |                  | <i>Ampharete</i> sp_1          | 0                 | 0   | 48  | 0   | 32  | 0   |
|              |                        |                  | <i>Anobothrus</i> sp_1         | 0                 | 0   | 0   | 0   | 16  | 0   |
|              |                        |                  | Ampharetidae _1                | 0                 | 0   | 0   | 0   | 0   | 16  |
|              |                        | Amphinomidae     | <i>Paramphinome jeffreysii</i> | 0                 | 0   | 16  | 127 | 64  | 48  |
|              |                        | Apistobranchidae | <i>Apistobranchus</i> sp_1     | 0                 | 0   | 0   | 16  | 48  | 16  |
|              |                        | Arenicolidae     | <i>Arenicola</i> sp_1          | 18                | 16  | 0   | 0   | 0   | 0   |
|              |                        | Capitellidae     | <i>Notomastus</i> sp_1         | 36                | 32  | 48  | 64  | 64  | 96  |
|              |                        |                  | <i>Heteromastus</i> sp_1       | 36                | 32  | 111 | 48  | 127 | 32  |
|              |                        |                  | <i>Capitella</i> sp_1          | 0                 | 16  | 96  | 96  | 159 | 32  |
|              |                        | Cirratulidae     | <i>Aphelochaeta</i> sp_1       | 127               | 64  | 96  | 255 | 541 | 271 |
|              |                        |                  | <i>Tharyx</i> sp_1             | 91                | 64  | 111 | 207 | 159 | 175 |
|              |                        |                  | <i>Caulleriella</i> sp_1       | 0                 | 16  | 48  | 80  | 64  | 64  |
|              |                        |                  | <i>Cirratulus</i> sp_1         | 18                | 32  | 16  | 0   | 0   | 0   |
|              |                        | Dorvilleidae     | <i>Protodorvillea</i> sp_1     | 36                | 64  | 111 | 127 | 96  | 143 |
|              |                        | Eunicidae        | <i>Eunice</i> sp_1             | 0                 | 0   | 0   | 16  | 32  | 0   |
|              |                        | Flabelligeridae  | <i>Brada</i> sp_1              | 18                | 0   | 32  | 0   | 16  | 0   |
|              |                        |                  | <i>Pherusa</i> sp_1            | 18                | 0   | 16  | 0   | 0   | 0   |
|              |                        | Glyceridae       | <i>Glycera</i> sp_1            | 127               | 80  | 143 | 366 | 287 | 318 |
|              |                        |                  | <i>Glycera</i> sp_2            | 73                | 32  | 96  | 16  | 0   | 0   |
|              |                        | Hesionidae       | Hesionidae sp_1                | 55                | 80  | 111 | 318 | 398 | 111 |
|              |                        |                  | <i>Kefersteinia cirrata</i>    | 0                 | 0   | 0   | 32  | 0   | 0   |
|              |                        | Lumbrineridae    | <i>Lumbrineris</i> sp_1        | 36                | 32  | 16  | 48  | 0   | 175 |
|              |                        | Maldanidae       | <i>Rhodine</i> sp_1            | 18                | 0   | 0   | 48  | 16  | 32  |
|              |                        |                  | <i>Clymenura</i> sp_1          | 0                 | 16  | 0   | 16  | 16  | 0   |
|              |                        |                  | <i>Praxillella</i> sp_1        | 0                 | 0   | 0   | 0   | 32  | 0   |
|              |                        |                  | <i>Nicomache</i> sp_1          | 0                 | 16  | 0   | 0   | 16  | 0   |
|              |                        |                  | <i>Euclymene</i> sp_1          | 18                | 16  | 16  | 0   | 0   | 0   |
|              |                        |                  | <i>Micronephthys</i> sp_1      | 18                | 48  | 0   | 80  | 64  | 64  |
|              |                        | Onuphidae        | <i>Paradiopatra</i> sp_1       | 18                | 0   | 0   | 16  | 0   | 0   |
|              |                        | Ophelidae        | <i>Ophelina</i> sp_1           | 0                 | 0   | 16  | 16  | 0   | 16  |
|              |                        | Orbinidae        | <i>Orbinia</i> sp_1            | 0                 | 16  | 0   | 0   | 0   | 0   |
|              |                        | Owenidae         | <i>Myriochele</i> sp_1         | 36                | 48  | 48  | 80  | 64  | 48  |
|              |                        | Paraonidae       | <i>Aricidea</i> sp_1           | 127               | 64  | 127 | 525 | 573 | 255 |
|              |                        |                  | <i>Cirrophorus</i> sp_1        | 18                | 0   | 0   | 32  | 0   | 0   |
|              |                        | Pectinariidae    | <i>Pectinaria</i> sp_1         | 0                 | 0   | 16  | 0   | 0   | 0   |
|              |                        | Pholoidae        | <i>Pholoe</i> sp_1             | 18                | 0   | 64  | 0   | 0   | 0   |
|              |                        | Phyllodoceidae   | <i>Phyllodoce</i> sp_1         | 0                 | 16  | 0   | 0   | 16  | 0   |
|              |                        | Pisionidae       | <i>Pisione</i> sp_1            | 0                 | 0   | 0   | 0   | 0   | 16  |
|              |                        | Poecilochaetidae | <i>Poecilochaetus</i> sp_1     | 0                 | 0   | 0   | 0   | 0   | 16  |
|              |                        | Polynoidae       | <i>Malmgreniella</i> sp_1      | 0                 | 0   | 64  | 0   | 0   | 0   |
|              |                        |                  | <i>Harmothoe</i> sp_1          | 0                 | 32  | 16  | 0   | 0   | 48  |
|              |                        |                  | Polynoidae sp_1                | 419               | 271 | 175 | 478 | 669 | 462 |
|              |                        | Sabellidae       | <i>Euchone</i> sp_1            | 91                | 32  | 32  | 96  | 64  | 32  |
|              |                        |                  | <i>Chone</i> sp_1              | 18                | 32  | 32  | 96  | 64  | 48  |
|              |                        | Scalibregmatidae | <i>Scalibregma</i> sp_1        | 36                | 48  | 0   | 16  | 32  | 111 |
| Sigalionidae | Sigalionidae sp_1      | 0                | 0                              | 0                 | 0   | 0   | 16  |     |     |
|              | <i>Neoleanira</i> sp_1 | 0                | 0                              | 0                 | 0   | 0   | 32  |     |     |

| Phylum              | Class /<br>sub-class | Order/Family      | gen/species                   | Sampling stations              |     |     |     |     |     |    |
|---------------------|----------------------|-------------------|-------------------------------|--------------------------------|-----|-----|-----|-----|-----|----|
|                     |                      |                   |                               | 107                            | 108 | 112 | 113 | 114 | 115 |    |
| Annelida            | Polychaeta           | Spionidae         | <i>Prionospio</i> sp_1        | 182                            | 207 | 541 | 398 | 398 | 366 |    |
|                     |                      |                   | <i>Spiophanes</i> sp_1        | 109                            | 80  | 127 | 111 | 64  | 80  |    |
|                     |                      |                   | <i>Aonides</i> sp_1           | 18                             | 16  | 16  | 0   | 0   | 16  |    |
|                     |                      | Spionidae         | <i>Polydora</i> sp_1          | 0                              | 16  | 64  | 32  | 32  | 32  |    |
|                     |                      |                   | Spionidae sp_1                | 0                              | 0   | 0   | 0   | 0   | 0   |    |
|                     |                      | Syllidae          | <i>Exogone</i> sp_1           | 146                            | 48  | 191 | 64  | 32  | 16  |    |
|                     |                      |                   | <i>Brania</i> sp_1            | 18                             | 48  | 32  | 16  | 0   | 0   |    |
|                     |                      | Terebellidae      | <i>Amphitritides</i> _1       | 0                              | 0   | 0   | 0   | 0   | 16  |    |
|                     |                      |                   | <i>Axionice</i> sp_1          | 0                              | 0   | 0   | 16  | 16  | 16  |    |
|                     |                      |                   | <i>Eupolymnia</i> sp_1        | 0                              | 16  | 0   | 0   | 16  | 0   |    |
|                     |                      |                   | <i>Lanassa</i> sp_1           | 18                             | 64  | 48  | 32  | 48  | 64  |    |
|                     |                      |                   | <i>Lanice</i> sp_1            | 0                              | 16  | 0   | 0   | 0   | 0   |    |
|                     |                      |                   | <i>Laphania</i> sp_1          | 0                              | 0   | 16  | 32  | 0   | 0   |    |
|                     |                      |                   | <i>Polycirrus</i> sp_1        | 0                              | 32  | 64  | 64  | 80  | 16  |    |
|                     |                      |                   | <i>Proclea</i> sp_1           | 0                              | 0   | 0   | 48  | 16  | 0   |    |
|                     |                      |                   | <i>Streblosoma</i> sp_1       | 0                              | 0   | 0   | 0   | 32  | 0   |    |
|                     |                      |                   | <i>Thelepus</i> sp_1          | 0                              | 0   | 64  | 0   | 64  | 0   |    |
|                     |                      | Terebellidae sp_1 | 0                             | 0                              | 0   | 48  | 0   | 0   |     |    |
|                     |                      | Trichobranchidae  | <i>Terebellides</i> sp_1      | 18                             | 16  | 0   | 0   | 64  | 16  |    |
|                     |                      | Polychaeta ind.   | Polychaeta sp_1               | 0                              | 0   | 0   | 16  | 48  | 32  |    |
| Cnidaria            | Anthozoa             | Edwardsiidae      | Edwardsiidae sp_1             | 18                             | 16  | 16  | 96  | 32  | 64  |    |
|                     |                      | Cerianthidae      | Cerianthidae sp_1             | 18                             | 0   | 0   | 16  | 16  | 0   |    |
| Ascidiacea          | -                    | -                 | Ascidiacea sp_1               | 0                              | 0   | 48  | 32  | 80  | 0   |    |
| Crustacea           | Decapoda             | -                 | Decapoda remain sp_1          | 0                              | 0   | 0   | 0   | 0   | 16  |    |
|                     | Amphipoda            | Ampeliscidae      | <i>Haploops</i> <i>setosa</i> | 0                              | 32  | 16  | 223 | 430 | 334 |    |
|                     |                      |                   | <i>Ampelisca</i> sp_1         | 18                             | 16  | 16  | 0   | 48  | 32  |    |
|                     |                      | Amphilochidae     | <i>Amphilochus</i> sp_1       | 18                             | 0   | 0   | 0   | 0   | 0   |    |
|                     |                      | Aoridae           | <i>Aoridae</i> sp_1           | 36                             | 32  | 0   | 0   | 0   | 0   |    |
|                     |                      |                   | <i>Microdeutopus</i> sp_1     | 0                              | 32  | 0   | 0   | 32  | 0   |    |
|                     |                      | Cressidae         | <i>Cressa</i> sp_1            | 0                              | 0   | 16  | 0   | 0   | 16  |    |
|                     |                      | Lysianassidae     | <i>Tryphosites</i> sp_1       | 0                              | 0   | 0   | 0   | 0   | 16  |    |
|                     |                      |                   | Lysianassidae sp_1            | 18                             | 0   | 0   | 0   | 0   | 0   |    |
|                     |                      | Oedicerotidae     | Oedicerotidae sp_1            | 0                              | 0   | 48  | 16  | 0   | 16  |    |
|                     |                      |                   | Oedicerotidae sp_2            | 0                              | 0   | 16  | 64  | 0   | 0   |    |
|                     |                      | Phoxocephalidae   | <i>Harpinia</i> sp_1          | 18                             | 32  | 32  | 32  | 96  | 96  |    |
|                     |                      |                   | <i>Harpinia</i> sp_2          | 36                             | 64  | 32  | 0   | 0   | 0   |    |
|                     |                      | Podoceridae       | Podoceridae sp_1              | 0                              | 16  | 16  | 143 | 32  | 16  |    |
|                     |                      |                   | Podoceridae sp_2              | 0                              | 0   | 0   | 16  | 16  | 0   |    |
|                     |                      | Stegocephalidae   | Stegocephalidae sp_1          | 0                              | 0   | 0   | 0   | 16  | 0   |    |
|                     |                      | Synopiidae        | <i>Bruzelia</i> sp_1          | 18                             | 16  | 0   | 0   | 0   | 0   |    |
|                     |                      | Amphipoda ind.    | Amphipoda sp_1                | 0                              | 0   | 0   | 0   | 16  | 0   |    |
|                     |                      |                   | Amphipoda sp_2                | 0                              | 0   | 0   | 0   | 16  | 0   |    |
|                     |                      |                   | Amphipoda sp_3                | 0                              | 0   | 0   | 16  | 0   | 0   |    |
|                     |                      |                   | Amphipoda sp_4                | 0                              | 0   | 0   | 16  | 0   | 0   |    |
|                     |                      |                   | Amphipoda sp_5                | 0                              | 16  | 16  | 16  | 0   | 0   |    |
|                     |                      |                   | Amphipoda sp_6                | 0                              | 0   | 0   | 16  | 0   | 0   |    |
|                     |                      |                   | Amphipoda sp_7                | 0                              | 0   | 32  | 0   | 0   | 0   |    |
|                     |                      |                   | Amphipoda sp_8                | 0                              | 16  | 48  | 0   | 0   | 0   |    |
|                     |                      | Isopoda           | Anthuridae                    | <i>Cyathura</i> sp_1           | 0   | 0   | 0   | 0   | 0   | 16 |
|                     |                      |                   |                               | <i>Colanthura</i> sp_1         | 0   | 16  | 0   | 0   | 0   | 0  |
|                     |                      |                   |                               | <i>Leptanthura</i> sp_1        | 18  | 0   | 0   | 0   | 0   | 0  |
|                     |                      |                   | Cryptoniscidae                | Cryptoniscidae sp_1            | 18  | 0   | 0   | 16  | 0   | 0  |
|                     |                      |                   | Desmosomatidae                | <i>Desmosoma</i> sp_1          | 18  | 0   | 0   | 0   | 0   | 0  |
|                     |                      |                   | Eurycopidae                   | <i>Disconectes latirostris</i> | 0   | 0   | 0   | 0   | 16  | 0  |
|                     |                      |                   |                               | <i>Eurycope cornuta</i>        | 0   | 0   | 0   | 32  | 0   | 0  |
|                     |                      |                   | Gnathiidae                    | <i>Gnathia</i> sp_1            | 18  | 32  | 16  | 0   | 16  | 0  |
| <i>Gnathia</i> sp_2 | 0                    |                   |                               | 32                             | 0   | 0   | 32  | 0   |     |    |

| Phylum                   | Class /<br>sub-class | Order/Family                 | gen/species                   | Sampling stations              |      |      |      |      |      |      |
|--------------------------|----------------------|------------------------------|-------------------------------|--------------------------------|------|------|------|------|------|------|
|                          |                      |                              |                               | 107                            | 108  | 112  | 113  | 114  | 115  |      |
| Crustacea                | Isopoda              | Ilyarachnidae                | <i>Ilyarachna triangular</i>  | 18                             | 16   | 16   | 64   | 111  | 80   |      |
|                          |                      | Ischnomesidae                | <i>Ischnomesus norvegicus</i> | 36                             | 16   | 0    | 143  | 191  | 0    |      |
|                          |                      | Sphaeromatoidea              | <i>Bathycopea</i> sp_1        | 18                             | 0    | 0    | 0    | 0    | 16   |      |
|                          | Tanaidacea           | Agathotanaidae               | Agathotanaidae sp_1           | 0                              | 0    | 0    | 0    | 16   | 16   |      |
|                          |                      |                              | Agathotanaidae sp_2           | 55                             | 48   | 64   | 48   | 0    | 0    |      |
|                          |                      |                              | <i>Paranarthrura</i> sp_1     | 18                             | 0    | 16   | 64   | 48   | 16   |      |
|                          |                      | Anarthruridae                | Anarthruridae sp_1            | 146                            | 111  | 16   | 111  | 64   | 32   |      |
|                          |                      | Apseudidae                   | <i>Apseudes</i> sp_1          | 0                              | 0    | 48   | 0    | 0    | 16   |      |
|                          |                      | Leptognathiidae              | Leptognathiidae_1             | 0                              | 16   | 16   | 0    | 0    | 64   |      |
|                          |                      | Typhlotanaiidae              | <i>Typhlotanais</i> sp_1      | 0                              | 0    | 0    | 0    | 32   | 0    |      |
|                          |                      | Paratanaiidae                | Paratanaiidae sp_1            | 0                              | 0    | 0    | 0    | 64   | 32   |      |
|                          |                      | Tanaidacea ind.              | Tanaidacea sp_1               | 0                              | 0    | 0    | 0    | 0    | 0    |      |
|                          |                      | Ostracoda                    | -                             | Ostracoda sp_1                 | 0    | 16   | 143  | 223  | 255  | 350  |
|                          | -                    |                              | Ostracoda sp_2                | 0                              | 32   | 0    | 32   | 111  | 0    |      |
|                          | -                    |                              | Ostracoda sp_3                | 0                              | 0    | 0    | 80   | 16   | 48   |      |
|                          | Cumacea              | Pontocyprididae              | <i>Pontocypris</i> sp_1       | 55                             | 48   | 127  | 16   | 0    | 32   |      |
|                          |                      | Diastylidae                  | <i>Diastylis</i> sp_1         | 36                             | 48   | 48   | 16   | 64   | 64   |      |
|                          |                      |                              | <i>Diastylis</i> sp_2         | 18                             | 0    | 0    | 0    | 16   | 0    |      |
|                          |                      | Lampropidae                  | <i>Hemilamprops</i> sp_1      | 0                              | 0    | 0    | 0    | 16   | 0    |      |
|                          |                      | Leuconidae                   | Leuconidae sp_1               | 0                              | 0    | 16   | 0    | 0    | 0    |      |
|                          |                      | Nannastacidae                | <i>Campylaspis</i> sp_1       | 0                              | 0    | 0    | 16   | 0    | 0    |      |
|                          |                      | Copepoda                     | Harpacticoida                 | Harpacticoida sp_1             | 18   | 96   | 127  | 207  | 318  | 223  |
|                          | Brachipoda           | Rhynchonellata               | Dallinidae                    | Dallinidae sp_1                | 0    | 0    | 0    | 0    | 16   | 0    |
|                          |                      |                              | Kraussinidae                  | Kraussinidae sp_2              | 0    | 0    | 32   | 0    | 16   | 0    |
|                          | Nematoda             | -                            | -                             | Nematoda                       | 965  | 892  | 1592 | 2468 | 2755 | 3742 |
|                          | Echinodermata        | Ophiuroidea                  | Ophiuridae                    | <i>Ophiocten gracilis</i>      | 1583 | 2866 | 1799 | 1736 | 1051 | 1401 |
| <i>Ophiocten affinis</i> |                      |                              |                               | 73                             | 32   | 16   | 0    | 0    | 16   |      |
| Amphilepididae           |                      |                              | <i>Amphilepis</i> sp_1        | 0                              | 16   | 32   | 0    | 0    | 0    |      |
| Echinoidea               |                      | -                            | Amphiuridae                   | <i>Amphipholis</i> sp_1        | 0    | 0    | 16   | 0    | 0    | 0    |
|                          |                      |                              | Echinoidea sp_1               | 0                              | 0    | 16   | 16   | 16   | 32   |      |
| Asteroidea               |                      | -                            | Echinoidea sp_2               | 0                              | 0    | 16   | 16   | 16   | 16   |      |
|                          |                      |                              | Asteroidea post-larva         | 0                              | 0    | 0    | 16   | 0    | 0    |      |
| Holothuroidea            |                      | -                            | Holothuroidea sp_1            | 0                              | 64   | 32   | 48   | 48   | 48   |      |
|                          |                      |                              | Holothuroidea sp_2            | 55                             | 0    | 0    | 0    | 48   | 16   |      |
| Mollusca                 |                      | Bivalvia                     | Anomiidae                     | <i>Heteranomia squamula</i>    | 0    | 0    | 32   | 0    | 16   | 223  |
|                          |                      |                              | Arcidae                       | <i>Batharca pectunculoides</i> | 36   | 16   | 0    | 32   | 0    | 32   |
|                          |                      |                              | Cuspidariidae                 | <i>Cuspidaria parva</i>        | 0    | 0    | 0    | 32   | 16   | 0    |
|                          |                      |                              |                               | <i>Cardiomya costellata</i>    | 0    | 0    | 16   | 0    | 0    | 0    |
|                          | Limidae              |                              | <i>Limatula subovata</i>      | 0                              | 0    | 16   | 16   | 0    | 16   |      |
|                          |                      |                              | <i>Limaria loscombi</i>       | 0                              | 0    | 0    | 0    | 16   | 0    |      |
|                          | Mytilidae            |                              | <i>Modiolus</i> sp_1          | 18                             | 48   | 0    | 0    | 0    | 0    |      |
|                          | Nuculanidae          |                              | <i>Ledella pustulosa</i>      | 0                              | 0    | 0    | 32   | 0    | 48   |      |
|                          |                      |                              | <i>Ledella acuminata</i>      | 0                              | 0    | 0    | 16   | 0    | 0    |      |
|                          |                      |                              | <i>Nucula</i> sp_1            | 0                              | 0    | 0    | 0    | 0    | 32   |      |
|                          | Yoldiidae            |                              | <i>Yoldiella</i> sp_1         | 55                             | 111  | 64   | 80   | 111  | 127  |      |
|                          | Pectinidae           |                              | <i>Delectopecten vitreus</i>  | 0                              | 16   | 16   | 16   | 64   | 80   |      |
|                          |                      |                              | <i>Delectopecten</i> sp_2     | 36                             | 16   | 16   | 16   | 0    | 0    |      |
|                          |                      |                              | <i>Pecten</i> sp_1            | 0                              | 0    | 0    | 0    | 48   | 0    |      |
|                          |                      |                              | <i>Pristigloma nitens</i>     | 18                             | 0    | 0    | 0    | 0    | 0    |      |
|                          | Sareptidae           |                              | <i>Abra prismatica</i>        | 0                              | 0    | 0    | 0    | 16   | 0    |      |
|                          | Semelidae            |                              | <i>Abra longicallus</i>       | 0                              | 16   | 0    | 16   | 48   | 0    |      |
|                          |                      |                              | <i>Mendicula pygmaea</i>      | 0                              | 0    | 16   | 0    | 48   | 0    |      |
|                          | Thyasiridae          |                              | <i>Thyasira succisa</i>       | 18                             | 0    | 48   | 0    | 48   | 32   |      |
|                          |                      |                              | <i>Axinulus</i> sp_1          | 0                              | 0    | 0    | 32   | 32   | 0    |      |
| Thyasiridae_1            |                      | 0                            | 0                             | 16                             | 0    | 0    | 0    |      |      |      |
| Thyasiridae_2            |                      | 18                           | 32                            | 127                            | 80   | 0    | 32   |      |      |      |
| Gastropoda               | Columbellidae        | <i>Amphissa acutecostata</i> | 0                             | 0                              | 32   | 0    | 0    | 0    |      |      |

| Phylum    | Class /<br>sub-class | Order/Family    | gen/species             | Sampling stations |     |     |     |     |     |
|-----------|----------------------|-----------------|-------------------------|-------------------|-----|-----|-----|-----|-----|
|           |                      |                 |                         | 107               | 108 | 112 | 113 | 114 | 115 |
| Mollusca  | Gastropoda           | Cimidae         | <i>Cima minima</i>      | 0                 | 16  | 0   | 0   | 0   | 0   |
|           |                      | Eulimidae       | <i>Eulima bilineata</i> | 0                 | 16  | 0   | 0   | 0   | 16  |
|           |                      | -               | Gastropoda sp_1         | 0                 | 0   | 16  | 0   | 0   | 0   |
|           | Gastropoda           | Pyramidellidae  | <i>Eulimella</i> sp_1   | 0                 | 0   | 0   | 0   | 0   | 16  |
|           |                      | Naticidae       | <i>Lunatia pallida</i>  | 0                 | 16  | 0   | 0   | 0   | 0   |
|           |                      | Opisthobranchia | Opisthobranchia sp_1    | 0                 | 0   | 0   | 64  | 16  | 32  |
|           | Opisthobranchia sp_2 |                 | 0                       | 0                 | 0   | 0   | 48  | 0   |     |
|           | Scaphopoda           | Dentaliidae     | <i>Dentalium</i> sp_1   | 0                 | 0   | 32  | 16  | 16  | 0   |
|           |                      | Gadilidae       | <i>Cadulus</i> sp_1     | 16                | 191 | 271 | 143 | 64  | 48  |
|           |                      | Pulsellidae     | <i>Pulsellum</i> sp_1   | 0                 | 16  | 111 | 32  | 127 | 48  |
|           | Caudofoveata         | -               | Scaphopoda sp_1         | 0                 | 0   | 0   | 0   | 32  | 0   |
|           |                      | -               | Caudofoveata sp_1       | 0                 | 0   | 64  | 32  | 48  | 0   |
|           | Solenogastres        | -               | Solenogastres sp_1      | 146               | 111 | 159 | 159 | 223 | 350 |
|           |                      | -               | Solenogastres sp_2      | 0                 | 16  | 0   | 0   | 0   | 0   |
| Echiura   | -                    | -               | Echiura sp_1            | 18                | 16  | 16  | 16  | 48  | 96  |
| Sipuncula | -                    | -               | Sipuncula sp_1          | 36                | 16  | 111 | 0   | 48  | 32  |
|           | -                    | -               | Sipuncula sp_2          | 0                 | 16  | 16  | 111 | 96  | 16  |
